# Supplementary material for: Expression of Nerve Growth Factor and Its Receptor TrkA in the Reproductive System of Adult Zebrafish
Source: MDPI journal article supplement (doi:10.3390/vetsci9050225), 2022-05-06
Supplement: s1 [file s1]

Supplementary Figure S1

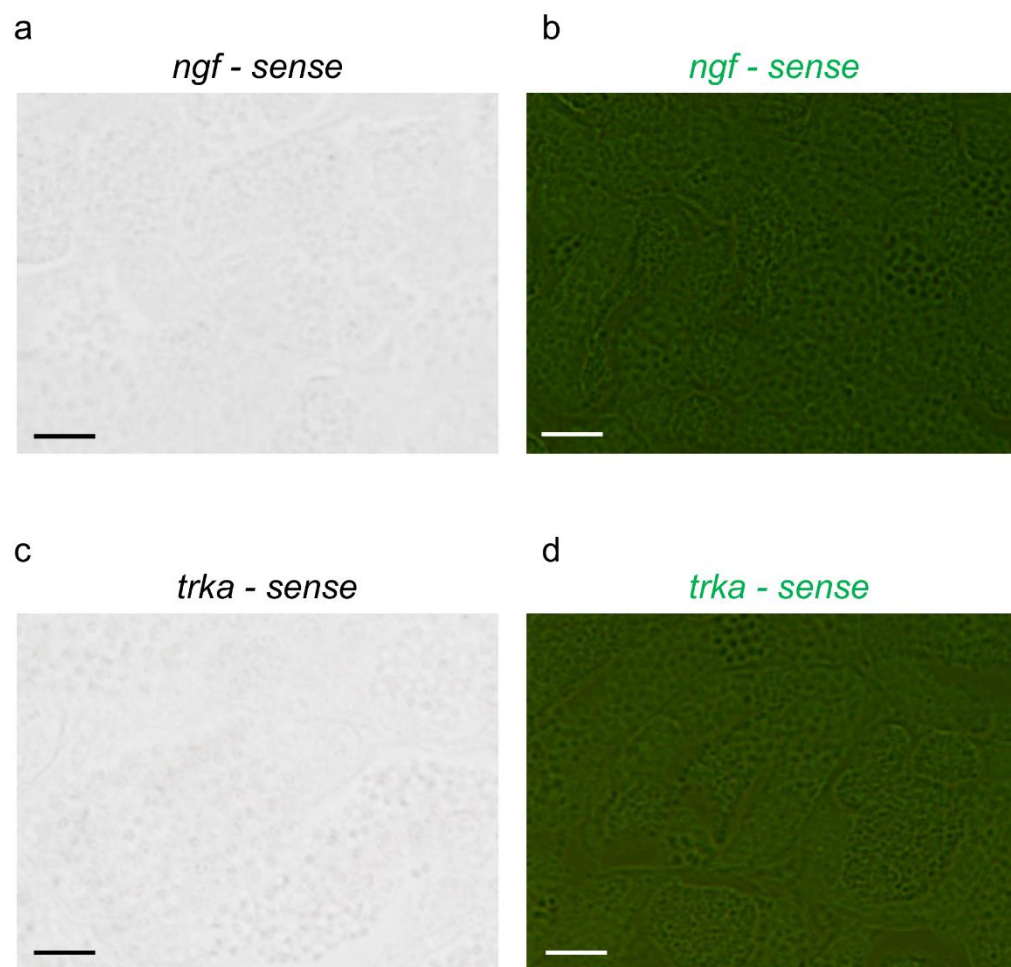

**Supplementary Figure S1.** *ngf* and *trks* sense probes staining in testis. (a–b) *ngf* sense probe, chromogenic and fluorescence in situ hybridization stainings. (c–d) *trka* sense probe, chromogenic and fluorescence in situ hybridization stainings, on paraffin sections of adult zebrafish testis.

## Supplementary Figure S2

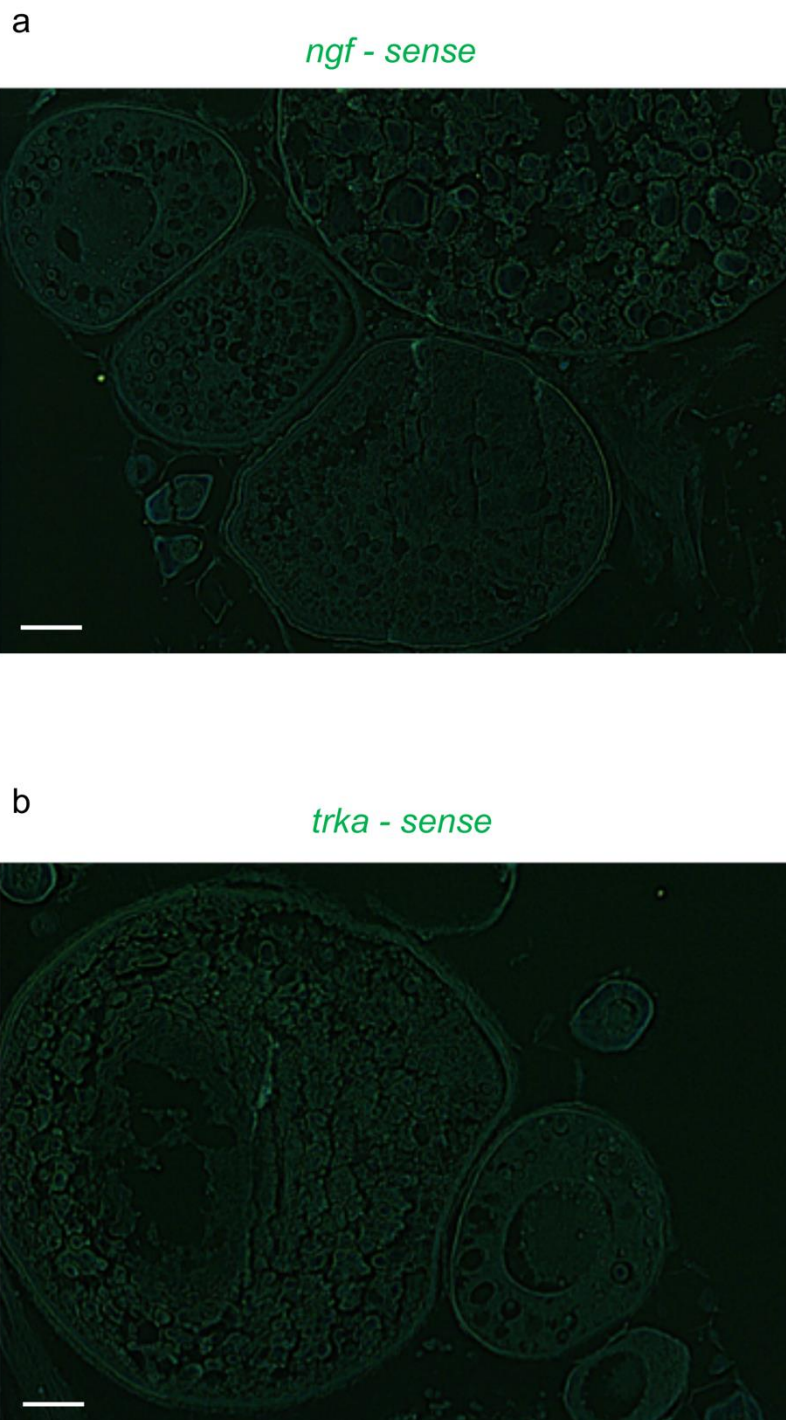

**Supplementary Figure S2.** *ngf* and *trka* sense probe staining in ovary. (a–b) *ngf* and *trka* sense probes, chromogenic and fluorescence in situ hybridization stainings on paraffin sections of adult zebrafish ovary.
